# Supplementary material
Source: publisher site journal article supplement (https://www.dovepress.com/get_supplementary_file.php?f=186217-TS1.xlsx)
Supplement: Supplementary file 1 [file get_supplementary_file.php]

## Sheet: Sheet1
	input_CpGislands	All_input	back_CpGislands	All CpGs	hypergeometric_pvalue
AvsB_all_diff	1976	5309	145787	473543	5.75693e-24
AvsB_hyper_diff	1896	3619	145787	473543	1.70098e-161
AvsB_hypo_diff	80	1690	145787	473543	1
CvsD_all_diff	1821	6213	145787	473543	0.994801
CvsD_hyper_diff	1730	4032	145787	473543	1.06296e-59
CvsD_hypo_diff	91	2181	145787	473543	1
